# Supplementary material
Source: PubMed Central journal article supplement (PMC7610776)
Supplement: EMS123326-supplement-Appendix.pdf [file EMS123326-supplement-Appendix.pdf]

## Appendix: Members of the CARE-MND Consortium

David Thomson (Department of Neurology, NHS Forth Valley, Larbert, UK), Louise Murrie (Department of Neurology, NHS Fife, Kirkcaldy, UK), Jenny Preston (Department of Neurology, NHS Ayrshire & Arran, Ayr, UK), Robert Swingler (Centre for Clinical Brain Sciences, University of Edinburgh, UK; Euan MacDonald Centre for Motor Neurone Disease Research, University of Edinburgh, UK), Danielle Leighton (Department of Neurology, NHS Greater Glasgow & Clyde, Glasgow, UK), Juan Larraz (Centre for Clinical Brain Sciences, University of Edinburgh, UK; Anne Rowling Regenerative Neurology Clinic, Royal Infirmary, Edinburgh, UK), Ian Morrison (Department of Neurology, NHS Tayside, Dundee, UK), George Gorrie (Euan MacDonald Centre for Motor Neurone Disease Research, University of Edinburgh, UK; Department of Neurology, NHS Tayside, Dundee, UK), Callum Duncan (Department of Neurology, NHS Grampian, Aberdeen, UK), Myles Connor (Department of Neurology, NHS Borders, Melrose, UK), David Simpson (Department of Neurology, NHS Borders, Melrose, UK), Ondrej Dolezal (Department of Neurology, NHS Highland, Inverness, UK), Katja Lassak (Department of Neurology, NHS Fife, Kirkcaldy, UK), Antonella Benvenga (Department of Neurology, NHS Fife, Kirkcaldy, UK), Javier Carod Artal (Department of Neurology, NHS Highland, Inverness, UK), Andrew Bethell (Department of Neurology, NHS Highland, Inverness, UK), Gillian Craig (Department of Neurology, NHS Tayside, Dundee, UK), Laura Cunningham (Department of Neurology, NHS Greater Glasgow & Clyde, Glasgow, UK), Moira Flett (Department of Neurology, NHS Orkney, Orkney, UK), Janice Hatrick (Department of Neurology, NHS Greater Glasgow & Clyde, Glasgow, UK), Helen Lennox (Department of Neurology, NHS Ayrshire & Arran, Ayr, UK), Laura Marshall (Department of Neurology, NHS Forth Valley, Larbert, UK; Department of Neurology, NHS Fife, Kirkcaldy, UK), Dympna McAleer (Department of Neurology, NHS Tayside, Dundee, UK), Alison McEleney (Dementia Research

Institute at University of Edinburgh, Edinburgh, UK), Kitty Millar (Department of Neurology, NHS Highland, Inverness, UK), Suzanne Byrne (Department of Neurology, NHS Greater Glasgow & Clyde, Glasgow, UK), Susan Stewart (Department of Neurology, NHS Grampian, Aberdeen, UK), Dorothy Storey (Department of Neurology, NHS Shetland, Shetland, UK), Gill Stott (Dementia Research Institute at University of Edinburgh, Edinburgh, UK), Carol Thornton (Department of Neurology, NHS Grampian, Aberdeen, UK), Carolyn Webber (Department of Neurology, NHS Tayside, Dundee, UK)
